# Supplementary material
Source: publisher figshare collection journal article supplement (https://acs.figshare.com/ndownloader/files/4100491)

Supplemental Figure 6

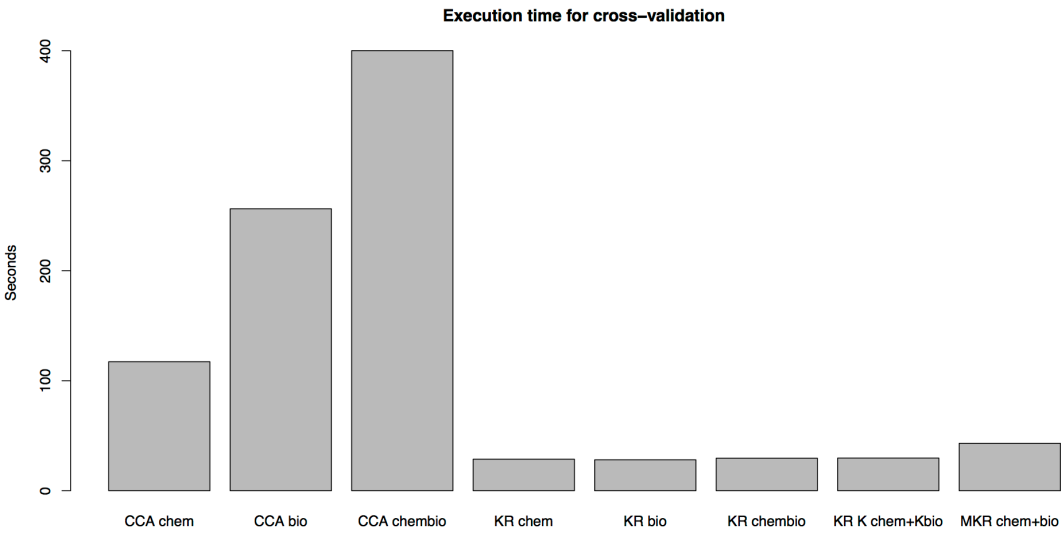

Supplement: Supplementary file 1 [file 4100491]
